# Supplementary material for: Simultaneous Detection of Both RNA and DNA Viruses Infecting Dry Bean and Occurrence of Mixed Infections by BGYMV, BCMV and BCMNV in the Central-West Region of Mexico
Source: Viruses. 2017 Mar 30;9(4):63. doi: 10.3390/v9040063 (PMC5408669; doi:10.3390/v9040063)
Supplement: Supplementary file 1 [file viruses-09-00063-s001.xlsx]

## Sheet: Table S1
Municipality	State	Type/cultivar	Symptoms	Growth stage	Coordinates	Altitude (m)	Year of collect	Viruses detected
								BGYMV	BCMV	BCMNV	BCMV and BCMNV	BCMV and BGYMV	BCMNV and BGYMV	BCMV, BCMNV and BGYMV	ND*
Acaponeta	Nayarit	Yellow/Amarillo 33	LCr, LCup, LCur, M, ML	R5 and R6	N 22°27´39.4" W 105°22´33.3"	12	2014	0	0	0	0	0	0	1	0
Acaponeta	Nayarit	Yellow/Amarillo 33	LCr, LCup, ML	R5 and R6	N 22°27´39.4" W 105°22´33.3"	12	2014	0	0	0	0	1	0	0	0
Bahía de Banderas	Nayarit	Peruano/NI	ML, GM, CLL, LCup	R6	N 20°56´03.7" W 105°04´42.1"	92	2014	1	0	0	0	0	0	0	0
Bahía de Banderas	Nayarit	Peruano/NI	CLL, NLL, PPLL, M	R6	N 20°56´03.7" W 105°04´42.1"	92	2014	0	0	0	0	1	0	0	0
Bahía de Banderas	Nayarit	Peruano/NI	CLL, LCr, ML	R6	N 20°56´03.7" W 105°04´42.1"	92	2014	0	0	0	0	1	0	0	0
Bahía de Banderas	Nayarit	Yellow/Mayocoba	GM, NLL, M, LCr	R5 and R6	N 20°55´57.7" W 105°02´17.1"	102	2014	1	0	0	0	0	0	0	0
Bahía de Banderas	Nayarit	Yellow/Mayocoba	LCup, GM, LCr	R5 and R6	N 20°55´57.7" W 105°02´17.1"	102	2014	1	0	0	0	0	0	0	0
Bahía de Banderas	Nayarit	Yellow/Mayocoba	GM, CLL, M	R5 and R6	N 20°55´57.7" W 105°02´17.1"	102	2014	1	0	0	0	0	0	0	0
Compostela	Nayarit	Peruano/NI	GM, LCur, LCr	R6	N 21°11´33.6" W 105°08´50.5"	20	2014	0	0	0	0	1	0	0	0
Compostela	Nayarit	Peruano/NI	GM, LCur, LCr, ML	R6	N 21°11´33.6" W 105°08´50.5"	20	2014	0	0	0	0	1	0	0	0
Compostela	Nayarit	Peruano/NI	NV, LCup, GM, ML, LCr, LCLL	R6	N 21°11´33.6" W 105°08´50.5"	20	2014	0	1	0	0	0	0	0	0
Compostela	Nayarit	Black/Jamapa	LCr, LCup, RCV, LCur,	R6	N 21°11´33.6" W 105°08´50.5"	20	2014	0	0	0	1	0	0	0	0
Compostela	Nayarit	Black/Jamapa	CLL, VY, M, LCup, LCr, ML	R6	N 21°11´33.6" W 105°08´50.5"	20	2014	0	0	0	0	0	0	1	0
Compostela	Nayarit	Pinto bean/Saltillo	NLL, LCup,	R5 and R6	N 21°11´33.6" W 105°08´50.5"	20	2014	0	0	0	0	0	0	1	0
Compostela	Nayarit	Black/Jamapa	M, LCup	R7	N 21°18´05.3" W 105°11´53.7"	16	2015	0	0	0	1	0	0	0	0
Compostela	Nayarit	Yellow/NI	CLL, NLL, M, LCup	R7	N 21°18´05.3" W 105°11´53.7"	16	2015	0	0	0	0	0	0	1	0
Compostela	Nayarit	Yellow/Mayocoba	M, CLL, LCup	R7	N 21°18´07.4" W 105°11´10.0"	22	2015	0	0	0	0	0	1	0	0
Ixtlan del Rio	Nayarit	Climbing/'Higuerillo' landrace	M, LCr, LCur,	R9	N 21°02´21.7'' W 104°20´25.1"	1117	2014	0	1	0	0	0	0	0	0
Jala	Nayarit	Climbing/'Garbancillo Zarco' landrace	M, LCr,	R9	N 21°09´19.3" W 104°28´54.3"	1380	2014	0	1	0	0	0	0	0	0
Jala	Nayarit	Peruano/NI	LCr, LCur	V4	N 21°09´16.3" W 104°28´54.9"	1372	2014	0	0	0	1	0	0	0	0
Rosamorada	Nayarit	Yellow/NI	ML, NLL, M, CLL, LCr	R5 and R6	N 22°07´13.0" W 105°13´00.6"	11	2014	0	0	1	0	0	0	0	0
Rosamorada	Nayarit	Yellow/NI	CLL, NLL, M	R5 and R6	N 22°07´13.0" W 105°13´00.6"	11	2014	0	0	1	0	0	0	0	0
Rosamorada	Nayarit	Yellow/NI	M, LCup, LCr, CLL	R5 and R6	N 22°01´59.1" W 105°14´08.3"	10	2014	0	0	0	0	0	0	1	0
Rosamorada	Nayarit	Yellow/NI	LCup, LCr, CLL, M, NLL	R5 and R6	N 22°01´59.1" W 105°14´08.3"	10	2014	0	0	1	0	0	0	0	0
Ruíz	Nayarit	Yellow/Mayocoba	NV, LCup, LCr	R5 and R6	N 21°56´23.2" W 105°11´02.4"	20	2014	0	0	0	0	1	0	0	0
Ruíz	Nayarit	Yellow/Mayocoba	LCur, CLL, NLL	R5 and R6	N 21°56´23.2" W 105°11´02.4"	20	2014	0	0	0	0	1	0	0	0
Ruíz	Nayarit	Yellow/NI	NS	R5 and R6	N 22°00´33.7" W 105°13´09.2"	23	2014	0	1	0	0	0	0	0	0
Ruíz	Nayarit	Yellow/NI	ML, CLL	R5 and R6	N 22°00´33.7" W 105°13´09.2"	23	2014	0	1	0	0	0	0	0	0
Ruíz	Nayarit	Yellow/NI	CLL, NLL, M, LCur	R5 and R6	N 22°00´33.7" W 105°13´09.2"	23	2014	0	1	0	0	0	0	0	0
Ruíz	Nayarit	Black/Jamapa	NLL, LCup	R6	N 21°57´41.9" W 105°10´32.9"	27	2015	0	0	1	0	0	0	0	0
Ruíz	Nayarit	Yellow/NI	CLL, M	R8	N 21°57´41.9" W 105°10´32.9"	22	2015	0	0	1	0	0	0	0	0
Ruíz	Nayarit	Yellow/NI	CLL, NLL, GM	R8	N 21°57´41.9" W 105°10´32.9"	22	2015	1	0	0	0	0	0	0	0
Ruíz	Nayarit	Yellow/NI	CLL, LCup	R8	N 21°57´41.9" W 105°10´32.9"	22	2015	0	0	0	1	0	0	0	0
San Blas	Nayarit	Black/Jamapa	M, CLL, NLL, LCup, PPLL	R7	N 21°43´01.5" W 105°14´45.0"	10	2015	0	0	0	0	0	0	0	1
San Blas	Nayarit	Black/Jamapa	LCur, M, CLL, NLL	R7	N 21°43´01.5" W 105°14´45.0"	10	2015	0	0	1	0	0	0	0	0
San Blas	Nayarit	Yellow/NI	M, LCup	R8	N 21°41´33.8" W 105°17´38.1"	11	2015	0	0	1	0	0	0	0	0
San Blas	Nayarit	Yellow/NI	M, LCup	R8	N 21°41´33.8" W 105°17´38.1"	11	2015	0	0	1	0	0	0	0	0
San Blas	Nayarit	Black/Jamapa	NLL, M, CLL	R8	N 21°40´12.4" W 105°20´13.9"	4	2015	0	0	0	1	0	0	0	0
San Blas	Nayarit	Black/Jamapa	LCup, CLL	R8	N 21°40´12.4" W 105°20´13.9"	4	2015	0	0	1	0	0	0	0	0
San Blas	Nayarit	Black/Jamapa	M, PPLL,	R8	N 21°38´59.2" W 105°22´05.5"	10	2015	0	0	1	0	0	0	0	0
San Blas	Nayarit	Yellow/NI	NLL, M, NLL	R7	N 21°39´23.6" W 105°23´20.9"	14	2015	0	0	0	0	0	0	1	0
San Blas	Nayarit	Black/Jamapa	M, LCup, ML, CLL	R7	N 21°36´17.2" W 105°18´16.0"	21	2015	0	1	0	0	0	0	0	0
San Blas	Nayarit	Yellow/NI	CLL, LCur	R8	N 21°36´55.6" W 105°18´33.0"	23	2015	0	0	1	0	0	0	0	0
San Blas	Nayarit	Black/Jamapa	CLL, NLL, NLL	R8	N 21°39´05.6" W 105°19´30.1"	9	2015	0	1	0	0	0	0	0	0
San Blas	Nayarit	Yellow/NI	NLL, CLL, RCV	R7	N 21°38´58.8" W 105°19´51.4"	7	2015	0	0	1	0	0	0	0	0
San Blas	Nayarit	Black/Jamapa	LCup, M	R7	N 21°38´35.6" W 105°20´18.3"	10	2015	0	0	1	0	0	0	0	0
San Blas	Nayarit	Black/Jamapa	M, NLL, CLL	R8	N 21°41´01.0" W 105°19´14.5"	14	2015	0	0	1	0	0	0	0	0
San Blas	Nayarit	Yellow/NI	NLL, CLL, NLL	R8	N 21°41´06.8" W 105°19´42.7"	18	2015	0	0	1	0	0	0	0	0
San Blas	Nayarit	Black/Jamapa	CLL, NLL,	R8	N 21°41´23.3" W 105°19´36.0"	12	2015	0	0	0	0	0	0	1	0
San Blas	Nayarit	Black/Jamapa	CLL,	R8	N 21°41´42.0" W 105°19´18.9"	13	2015	0	0	1	0	0	0	0	0
San Blas	Nayarit	Yellow/NI	NLL, LCup, CLL, NLL	R7	N 21°41´42.0" W 105°19´23.2"	14	2015	0	0	1	0	0	0	0	0
Santiago Ixcuintla	Nayarit	Black/NI	TN	R6	N 21°49´31.8'' W 105°11´08.5''	20	2014	0	0	0	0	0	0	0	1
Santiago Ixcuintla	Nayarit	Black/NI	GM	R6	N 21°49´31.8'' W 105°11´08.5''	20	2014	0	0	1	0	0	0	0	0
Santiago Ixcuintla	Nayarit	Flor de junio/Dalia	NV	R6	N 21°49´31.8'' W 105°11´08.5''	20	2014	0	0	0	0	0	0	0	1
Santiago Ixcuintla	Nayarit	Flor de junio/Dalia	NV	R6	N 21°49´31.8'' W 105°11´08.5''	20	2014	1	0	0	0	0	0	0	0
Santiago Ixcuintla	Nayarit	Yellow/Mayocoba	GM	R6	N 21°49´44.5'' W 105°09´53.9''	19	2014	0	0	0	0	0	0	0	1
Santiago Ixcuintla	Nayarit	Black/Jamapa	LCup, ML, CLL, M, NLL, LCr	R6	N 21°50´13.2" W 105°13´41.4"	3	2014	1	0	0	0	0	0	0	0
Santiago Ixcuintla	Nayarit	Black/Jamapa	LCup, LCr, M	R6	N 21°50´13.2" W 105°13´41.4"	3	2014	0	0	0	0	0	1	0	0
Santiago Ixcuintla	Nayarit	Black/Jamapa	LCup, LCr, ML, M, NLL	R6	N 21°50´13.2" W 105°13´41.4"	3	2014	0	0	0	0	0	1	0	0
Santiago Ixcuintla	Nayarit	Yellow/NI	CLL	R8	N 21°49´31.8'' W 105°11´08.5''	20	2015	0	0	0	0	0	1	0	0
Santiago Ixcuintla	Nayarit	Yellow/NI	LCup, ML, CLL	R8	N 21°49´31.8'' W 105°11´08.5''	20	2015	0	0	1	0	0	0	0	0
Santiago Ixcuintla	Nayarit	Pinto bean/Saltillo	TN, M	R8	N 21°49´31.8'' W 105°11´08.5''	20	2015	0	0	1	0	0	0	0	0
Santiago Ixcuintla	Nayarit	Pinto bean/Saltillo	LCr, CLL	R8	N 21°49´31.8'' W 105°11´08.5''	20	2015	0	0	0	0	0	0	0	1
Santiago Ixcuintla	Nayarit	Pinto bean/Saltillo	CLL, ML, LCup,	R8	N 21°49´31.8'' W 105°11´08.5''	20	2015	0	0	0	0	0	0	0	1
Santiago Ixcuintla	Nayarit	Black/Jamapa	M,CLL, LCup	R7	N 21°46´24.9" W 105°11´05.0"	16	2015	1	0	0	0	0	0	0	0
Santiago Ixcuintla	Nayarit	Black/Jamapa	M, LCup	R7	N 21°46´24.9" W 105°11´05.0"	16	2015	0	0	1	0	0	0	0	0
Santiago Ixcuintla	Nayarit	Pinto bean/Saltillo	NLL, LCup,ML, M	R8	N 21°45´53.8" W 105°13´28.3"	20	2015	0	0	1	0	0	0	0	0
Tecuala	Nayarit	Yellow/NI	LCup, ML, NLL, LCur, PPLL	R6	N 22°23´55.5" W 105°29´08.7"	21	2014	0	0	0	0	1	0	0	0
Tecuala	Nayarit	Black/NI	LCup, ML, M, LCr, LCur	R6	N 22°22´48.4" W 105°40´26.4"	20	2014	0	0	0	0	0	0	1	0
Tuxpan	Nayarit	Yellow/Mayocoba	M, CLL, LCup, LCur	R6	N 21°58´30.8" W 105°15´11.0"	35	2014	0	1	0	0	0	0	0	0
Tuxpan	Nayarit	Black/Jamapa	M, LCup, NLL, LCur, LCr	R6	N 21°58´56.5" W 105°16´20.6"	33	2014	0	0	1	0	0	0	0	0
Tuxpan	Nayarit	Yellow/NI	CLL, M, NLL, LCup, LCr	R5 and R6	N 21°52´38.0" W 105°16´05.4"	15	2014	0	0	1	0	0	0	0	0
Tuxpan	Nayarit	Yellow/NI	M, CLL, NLL, LCup, ML	R6	N 21°58´15.5" W 105°16´05.4"	9	2014	0	1	0	0	0	0	0	0
Celaya	Guanajuato	White bean/Aluyori	LCup, LCup	R5	N 20°34´52.8" W 100°49´14.6"	1766	2014	1	0	0	0	0	0	0	0
Celaya	Guanajuato	Yellow/Janasa	M	R8	N 20°34´52.8" W 100°49´14.6"	1766	2014	0	0	0	0	0	0	0	1
Celaya	Guanajuato	Yellow/NI	LCr, VY	R6	N 20°35´14.2" W 100°49´30.1"	1767	2014	0	0	0	0	0	0	0	1
Celaya	Guanajuato	Yellow/NI	LCr, VY	R6	N 20°35´14.2" W 100°49´30.1"	1767	2014	1	0	0	0	0	0	0	0
Celaya	Guanajuato	Yellow/NI	LCr, VY	R6	N 20°35´14.2" W 100°49´30.1"	1767	2014	0	1	0	0	0	0	0	0
Celaya	Guanajuato	Yellow/NI	LCr, VY	R6	N 20°35´14.2" W 100°49´30.1"	1767	2014	0	1	0	0	0	0	0	0
Celaya	Guanajuato	Yellow/NI	LCr, VY	R6	N 20°35´14.2" W 100°49´30.1"	1767	2014	0	1	0	0	0	0	0	0
Celaya	Guanajuato	Ejotero/NI	LCr, M, ML	R6	N 20°35´14.2" W 100°49´30.1"	1767	2014	0	0	0	0	0	0	0	1
Celaya	Guanajuato	Pinto bean/NI	ML, M, LCr	R6	N 20°35´14.2" W 100°49´30.1"	1767	2014	0	0	0	0	1	0	0	0
Celaya	Guanajuato	Pinto bean/NI	ML LCr	R6	N 20°35´14.2" W 100°49´30.1"	1767	2014	0	1	0	0	0	0	0	0
Celaya	Guanajuato	Pinto bean/NI	LCr, ML	R5	N 20°35´14.2" W 100°49´30.1"	1767	2014	0	0	0	0	0	0	0	1
Celaya	Guanajuato	Yellow/Higuera	ML, LCr, LCup, LCur, M	R5	N 20°35´14.2" W 100°49´30.1"	1767	2014	0	1	0	0	0	0	0	0
Celaya	Guanajuato	Yellow/Janasa	CLL, ML, LCr, LCur	R5	N 20°35´14.2" W 100°49´30.1"	1767	2014	0	1	0	0	0	0	0	0
Celaya	Guanajuato	White bean/Aluyori	LCup, LCur, CLL	R5	N 20°35´14.2" W 100°49´30.1"	1767	2014	0	0	0	0	0	0	0	1
Celaya	Guanajuato	Yellow/Higuera	LCr, CLL	R5	N 20°24´28.3'' W 100°47´26.8''	1787	2014	0	0	0	0	0	0	0	1
Celaya	Guanajuato	Yellow/Higuera	LCr, M	R5	N 20°24´28.3'' W 100°47´26.8''	1787	2014	0	0	0	0	0	0	0	1
Celaya	Guanajuato	Yellow/Higuera	NS	R5	N 20°24´28.3'' W 100°47´26.8''	1787	2014	0	1	0	0	0	0	0	0
Celaya	Guanajuato	Pinto bean/Saltillo	TN	R8	N 20°22´05.5" W 100°48´10.9''	1805	2014	0	0	0	0	0	0	0	1
Celaya	Guanajuato	Pinto bean/Saltillo	TN	R8	N 20°22´05.5" W 100°48´10.9''	1805	2014	0	0	0	0	0	0	0	1
Celaya	Guanajuato	Pinto bean/Centauro	TN	V4	N 20°35´14.2" W 100°49´30.1"	1768	2014	0	0	0	0	0	0	0	1
Celaya	Guanajuato	Pinto bean/Centauro	TN	V4	N 20°35´14.2" W 100°49´30.1"	1768	2014	0	0	0	0	0	0	0	1
Celaya	Guanajuato	Pinto bean/Centauro	TN	V4	N 20°35´14.2" W 100°49´30.1"	1768	2014	0	0	0	0	0	0	1	0
Celaya	Guanajuato	Pinto bean/Centauro	TN	V4	N 20°35´14.2" W 100°49´30.1"	1768	2014	0	0	1	0	0	0	0	0
Celaya	Guanajuato	Pinto bean/Centauro	TN	V4	N 20°35´14.2" W 100°49´30.1"	1768	2014	0	0	1	0	0	0	0	0
Celaya	Guanajuato	Pinto bean/Saltillo	TN	V4	N 20°35´14.2" W 100°49´30.1"	1768	2014	0	0	0	0	0	0	0	1
Celaya	Guanajuato	Pinto bean/Saltillo	TN	V4	N 20°35´14.2" W 100°49´30.1"	1768	2014	0	0	0	0	0	0	0	1
Celaya	Guanajuato	Pinto bean/Saltillo	TN	V4	N 20°35´14.2" W 100°49´30.1"	1768	2014	0	1	0	0	0	0	0	0
Celaya	Guanajuato	Pinto bean/Saltillo	TN	V4	N 20°35´14.2" W 100°49´30.1"	1768	2014	0	0	0	0	0	0	0	1
Celaya	Guanajuato	Pinto bean/Saltillo	TN	V4	N 20°35´14.2" W 100°49´30.1"	1768	2014	0	0	0	0	0	0	1	0
Celaya	Guanajuato	Pinto bean/Saltillo	TN	V4	N 20°35´14.2" W 100°49´30.1"	1768	2014	0	0	0	0	0	0	0	1
Celaya	Guanajuato	Pinto bean/Bravo	TN	V4	N 20°35´14.2" W 100°49´30.1"	1768	2014	0	0	0	0	0	0	0	1
Celaya	Guanajuato	Pinto bean/Bravo	TN	V4	N 20°35´14.2" W 100°49´30.1"	1768	2014	0	0	0	0	0	0	0	1
Celaya	Guanajuato	Pinto bean/Bravo	TN	V4	N 20°35´14.2" W 100°49´30.1"	1768	2014	0	0	0	0	0	0	0	1
Celaya	Guanajuato	Pinto bean/Bravo	TN	V4	N 20°35´14.2" W 100°49´30.1"	1768	2014	0	0	0	0	0	0	0	1
Celaya	Guanajuato	Pinto bean/Bravo	TN	V4	N 20°35´14.2" W 100°49´30.1"	1768	2014	0	1	0	0	0	0	0	0
Celaya	Guanajuato	Pinto bean/Bravo	TN	V4	N 20°35´14.2" W 100°49´30.1"	1768	2014	0	0	0	0	0	0	0	1
Celaya	Guanajuato	Yellow/Janasa	TN	V4	N 20°34´53.6'' W 100°49´20.1''	1767	2014	0	0	0	0	0	0	0	1
Celaya	Guanajuato	Yellow/Janasa	TN	V4	N 20°34´53.6'' W 100°49´20.1''	1767	2014	0	0	0	0	0	0	0	1
Cueramaro	Guanajuato	Cranberry/'Cacahuate bola' landrace	LCur, GS	R6	N 20°37´39.1'' W 101°41´06.06''	1737	2014	0	0	0	0	0	0	0	1
Cueramaro	Guanajuato	Cranberry/'Cacahuate bola' landrace	LCur, GS	R6	N 20°37´39.1'' W 101°41´06.06''	1737	2014	0	0	0	0	0	0	0	1
Cueramaro	Guanajuato	Cranberry/'Cacahuate bola' landrace	LCur, GS	R6	N 20°37´39.1'' W 101°41´06.06''	1737	2014	0	0	0	0	0	0	0	1
Cueramaro	Guanajuato	Cranberry/'Cacahuate bola' landrace	LCur, GS	R6	N 20°37´39.1'' W 101°41´06.06''	1737	2014	0	1	0	0	0	0	0	0
Huanimaro	Guanajuato	Flor de Mayo/NI	CLL	R6	N 20°21´58.0'' W 101°32´54.00''	1702	2014	0	0	0	0	0	0	0	1
Huanimaro	Guanajuato	Flor de Mayo/NI	CLL, M, LCr	R6	N 20°21´58.0'' W 101°32´54.00''	1702	2014	0	0	0	0	0	0	0	1
Huanimaro	Guanajuato	Flor de Junio/León	LCup, LY, NV	R6	N 20°22´54.5" W 101°45´43.6"	1732	2014	0	0	0	0	0	0	0	1
Huanimaro	Guanajuato	Flor de Junio/León	RCV	R6	N 20°22´54.5" W 101°45´43.6"	1732	2014	0	0	0	0	0	0	0	1
Huanimaro	Guanajuato	Flor de Junio/León	TN	R6	N 20°22´54.5" W 101°45´43.6"	1732	2014	1	0	0	0	0	0	0	0
Huanimaro	Guanajuato	Flor de Junio/León	M	R6	N 20°22´54.5" W 101°45´43.6"	1732	2014	0	0	0	0	0	0	0	1
Huanimaro	Guanajuato	Flor de Junio/Marcela	M	R6	N 20°22´54.5" W 101°45´43.6"	1732	2014	0	0	0	0	0	0	0	1
Huanimaro	Guanajuato	Flor de Junio/Marcela	LCr	R6	N 20°22´54.5" W 101°45´43.6"	1732	2014	0	0	0	0	0	0	0	1
Huanimaro	Guanajuato	Flor de Junio/Marcela	LCr	R6	N 20°22´54.5" W 101°45´43.6"	1732	2014	0	0	0	0	0	0	0	1
Huanimaro	Guanajuato	Flor de Junio/Marcela	LCr	R6	N 20°22´54.5" W 101°45´43.6"	1732	2014	0	0	0	0	0	0	0	1
Huanimaro	Guanajuato	Flor de Junio/Marcela	TN	R6	N 20°22´54.5" W 101°45´43.6"	1732	2014	0	0	0	0	0	0	0	1
Huanimaro	Guanajuato	Cranberry/'Cacahuate bola' landrace	GS, M	V4	N 20°24´20.5" W 101°44´48.6"	1761	2014	1	0	0	0	0	0	0	0
Huanimaro	Guanajuato	Cranberry/'Cacahuate bola' landrace	M, LCr, LCur	V4	N 20°24´20.5" W 101°44´48.6"	1761	2014	0	0	0	0	0	0	0	1
Huanimaro	Guanajuato	Cranberry/'Cacahuate bola' landrace	GS, LCr, ML	V4	N 20°24´20.5" W 101°44´48.6"	1761	2014	0	0	0	0	0	0	0	1
Romita	Guanajuato	Peruano/NI	LCur, LY, LCr, ML	R7 and R8	N 20°51´49.7" W 101°30´18.48"	1750	2014	0	0	0	0	1	0	0	0
Salvatierra	Guanajuato	Flor de Junio/NI	LCr, VY, ML	R6	N 20°13´06.6" W 101°02´11.40"	1737	2014	0	0	0	0	1	0	0	0
Salvatierra	Guanajuato	Cranberry/'Cacahuate bola' landrace	GM	R5	N 20°20´54.9" W 100°49´54.03"	1871	2014	0	1	0	0	0	0	0	0
Salvatierra	Guanajuato	Pinto bean/NI	TN, NV, NV	R8	N 20°20´14.3" W 100°50´03.72"	1863	2014	0	0	1	0	0	0	0	0
Salvatierra	Guanajuato	Black/Guanajuato	TN	R9	N 20°19´42.4" W 100°50´07.52"	1820	2014	0	0	1	0	0	0	0	0
Salvatierra	Guanajuato	Pinto bean/San Rafael	TN	R9	N 20°19´42.4" W 100°50´07.52"	1820	2014	0	0	1	0	0	0	0	0
Salvatierra	Guanajuato	Flor de Mayo/Dolores	TN	R9	N 20°19´42.4" W 100°50´07.52"	1820	2014	0	0	1	0	0	0	0	0
Salvatierra	Guanajuato	Flor de Junio/León	TN	R9	N 20°19´42.4" W 100°50´07.52"	1820	2014	0	0	0	0	0	0	0	1
Salvatierra	Guanajuato	Rojo/NI	TN	R9	N 20°19´42.4" W 100°50´07.52"	1820	2014	0	0	0	0	0	0	0	1
Salvatierra	Guanajuato	Flor de Junio/Dalia	TN	R9	N 20°19´42.4" W 100°50´07.52"	1820	2014	0	1	0	0	0	0	0	0
Salvatierra	Guanajuato	Pinto bean/Saltillo	TN	R9	N 20°19´42.4" W 100°50´07.52"	1820	2014	0	0	0	0	0	0	0	1
Salvatierra	Guanajuato	Pinto bean/NI	TN	R9	N 20°19´42.4" W 100°50´07.52"	1820	2014	0	0	0	0	0	0	0	1
Salvatierra	Guanajuato	Flor de Junio/Marcela	TN	R9	N 20°19´42.4" W 100°50´07.52"	1820	2014	0	0	1	0	0	0	0	0
Silao	Guanajuato	Cranberry/'Cacahuate bola' landrace	LCur, LY, LCr, LCup, ML	R7 and R8	N 20°50´52.4" W 101°19´00.78"	1787	2014	0	0	0	0	0	0	0	1
Silao	Guanajuato	Peruano/NI	LCur, LY, LCr, ML	R7 and R8	N 20°50´52.4" W 101°19´00.78"	1787	2014	0	1	0	0	0	0	0	0
Valle de Santiago	Guanajuato	Climbing/NI	LCr, M	R6	N 20°17´56.4" W 101°17´07.46"	2204	2014	0	0	0	0	0	0	0	1
Valle de Santiago	Guanajuato	Climbing/NI	LCur, LCr, LCr	R6	N 20°17´56.4" W 101°17´07.46"	2204	2014	0	1	0	0	0	0	0	0
Valle de Santiago	Guanajuato	Flor de Mayo/Eugenia	CLL	R8	N 20°18´14.4" W 100°17´35.37"	2424	2014	0	0	0	0	0	0	0	1
Yuriria	Guanajuato	Flor de Junio/NI	M,ML, LCr	R6	N 20°15´11.2" W 101°12´04.68"	1751	2014	0	1	0	0	0	0	0	0
Yuriria	Guanajuato	Flor de Junio/NI	M, ML, LCr	R6	N 20°15´11.2" W 101°12´04.68"	1751	2014	0	1	0	0	0	0	0	0
Arandas	Jalisco	NI/NI	GS, Lcur, M	R5	N 20°39´09.1" W 102°21´25.00"	1982	2014	0	1	0	0	0	0	0	0
Arandas	Jalisco	NI/NI	GS, Lcur, M	R5	N 20°39´09.1" W 102°21´25.00"	1982	2014	0	0	0	0	0	0	0	1
Arandas	Jalisco	NI/NI	GS, Lcur, M	R5	N 20°39´09.1" W 102°21´25.00"	1982	2014	0	1	0	0	0	0	0	0
Arandas	Jalisco	NI/NI	GS, Lcur, M	R5	N 20°39´09.1" W 102°21´25.00"	1982	2014	0	1	0	0	0	0	0	0
Arandas	Jalisco	NI/NI	GS, Lcur, M	R5	N 20°39´09.1" W 102°21´25.00"	1982	2014	0	0	0	0	0	0	0	1
Arandas	Jalisco	NI/NI	GS, Lcur, M	R5	N 20°39´09.1" W 102°21´25.00"	1982	2014	0	1	0	0	0	0	0	0
Arandas	Jalisco	Climbing/NI	GS, LCr	R6	N 20°43´06.6" W 102°26´17.28"	2008	2014	0	0	0	0	0	0	0	1
Arandas	Jalisco	Climbing/NI	GS, LCr	R6	N 20°43´06.6" W 102°26´17.28"	2008	2014	0	1	0	0	0	0	0	0
Arandas	Jalisco	Climbing/NI	M	R6	N 20°43´06.6" W 102°26´17.28"	2008	2014	0	0	1	0	0	0	0	0
Arandas	Jalisco	Climbing/NI	M	R6	N 20°43´06.6" W 102°26´17.28"	2008	2014	0	0	1	0	0	0	0	0
Arandas	Jalisco	Climbing/NI	M, LCr	R6	N 20°43´06.6" W 102°26´17.28"	2008	2014	0	0	1	0	0	0	0	0
Arandas	Jalisco	Climbing/'Garbancillo Zarco' landrace	NS	R6	N 20°43´25.5" W 102°27´06.00"	2024	2014	0	0	0	0	0	0	0	1
Arandas	Jalisco	Climbing/'Garbancillo Zarco' landrace	LCr, LCu	R6	N 20°43´25.5" W 102°27´06.00"	2024	2014	0	0	0	1	0	0	0	0
Arandas	Jalisco	Climbing/'Garbancillo Zarco' landrace	LY, LCur	R6	N 20°43´25.5" W 102°27´06.00"	2024	2014	0	0	0	1	0	0	0	0
Arandas	Jalisco	Climbing/'Garbancillo Zarco' landrace	NS	R6	N 20°43´25.5" W 102°27´06.00"	2024	2014	0	1	0	0	0	0	0	0
Arandas	Jalisco	Climbing/'Garbancillo Zarco' landrace	NS	R6	N 20°43´25.5" W 102°27´06.00"	2024	2014	0	0	0	1	0	0	0	0
Arandas	Jalisco	Climbing/'Garbancillo Zarco' landrace	M, LCr, LCur	R6	N 20°43´25.5" W 102°27´06.00"	2024	2014	0	1	0	0	0	0	0	0
Arandas	Jalisco	Climbing/'Garbancillo Zarco' landrace	LCr, M	R6	N 20°43´25.5" W 102°27´06.00"	2024	2014	0	1	0	0	0	0	0	0
Arandas	Jalisco	Climbing/'Garbancillo Zarco' landrace	M	R6	N 20°43´25.5" W 102°27´06.00"	2024	2014	0	1	0	0	0	0	0	0
Arandas	Jalisco	Climbing/'Garbancillo Zarco' landrace	ML	R6	N 20°43´25.5" W 102°27´06.00"	2024	2014	0	0	0	0	0	0	0	1
Arandas	Jalisco	Climbing/White seed landrace	M	R6	N 20°54´01.6" W 102°21´57.84"	2076	2014	0	0	0	1	0	0	0	0
Arandas	Jalisco	Climbing/White seed landrace	M	R6	N 20°54´01.6" W 102°21´57.84"	2076	2014	0	1	0	0	0	0	0	0
Arandas	Jalisco	Climbing/White seed landrace	M	R6	N 20°54´01.6" W 102°21´57.84"	2076	2014	0	0	0	1	0	0	0	0
Arandas	Jalisco	Climbing/White seed landrace	M	R6	N 20°54´01.6" W 102°21´57.84"	2076	2014	0	1	0	0	0	0	0	0
Arandas	Jalisco	Climbing/White seed landrace	M	R6	N 20°54´01.6" W 102°21´57.84"	2076	2014	0	0	0	1	0	0	0	0
Arandas	Jalisco	Climbing/White seed landrace	M	R6	N 20°54´01.6" W 102°21´57.84"	2076	2014	0	0	0	1	0	0	0	0
Puerto Vallarta	Jalisco	Flor de Junio/Marcela	GM, ML, PPLL, CLL	R6	N 20°48´52.4" W 105°09´32.8"	31	2014	1	0	0	0	0	0	0	0
Puerto Vallarta	Jalisco	Flor de Junio/Marcela	M, LCr, ML, NLL	R6	N 20°48´52.4" W 105°09´32.8"	31	2014	0	0	1	0	0	0	0	0
Puerto Vallarta	Jalisco	Flor de Junio/Marcela	GM, LCr, ML	R6	N 20°48´52.4" W 105°09´32.8"	31	2014	0	0	0	0	0	0	0	1
Puerto Vallarta	Jalisco	Yellow/NI	LCup, GM, ML	R6	N 20°50´31.8" W 105°09´32.9"	39	2014	1	0	0	0	0	0	0	0
Puerto Vallarta	Jalisco	Yellow/NI	NLL, LCup, M	R6	N 20°50´31.8" W 105°09´32.9"	39	2014	0	0	0	0	1	0	0	0
Tanhuato	Jalisco	Peruano/NI	M	R8	N 20°16´44.6" W 102°22´21.58"	1541	2014	0	1	0	0	0	0	0	0
Tanhuato	Jalisco	Peruano/NI	M	R8	N 20°16´44.6" W 102°22´21.58"	1541	2014	0	1	0	0	0	0	0	0
Tanhuato	Jalisco	Peruano/NI	M	R8	N 20°16´44.6" W 102°22´21.58"	1541	2014	0	1	0	0	0	0	0	0
Tanhuato	Jalisco	Peruano/NI	LCur, LCr, M, LY	R8	N 20°16´44.6" W 102°22´21.58"	1541	2014	0	1	0	0	0	0	0	0
Zapotlanejo	Jalisco	Flor de Junio/NI	LCur, M,	R9	N 20°36´47.9" W 102°51´55.78"	1741	2014	0	0	0	1	0	0	0	0
Zapotlanejo	Jalisco	Cranberry/'Cacahuate bola' landrace	CLL, LCur, CLL	R9	N 20°36´47.9" W 102°51´55.78"	1741	2014	0	0	0	0	0	0	0	1
Zapotlanejo	Jalisco	Cranberry/'Cacahuate bola' landrace	LCr	R9	N 20°36´47.9" W 102°51´55.78"	1741	2014	0	0	0	0	0	0	0	1
*: ND (No detected)
Abbreviations
CLL	Chlorotic local lesions
GM	Golden mosaic
GS	General stunting
LCr	Leaf crinkling
LCup	Leaf cupping
LCur	Leaf curling
LY	Leaf yellowing
M	Mosaics
ML	Malformation of leaves
NLL	Necrotic local lesions
NS	No symptoms
NV	Necrotic veins
PPLL	Pin-point local lesions
RCV	Reddish colored veins
TN	Top necrosis
VY	Vein yellowing
